# Supplementary material
Source: PubMed Central journal article supplement (PMC3697847)
Supplement: NIHMS480515-supplement-01.pdf [file NIHMS480515-supplement-01.pdf]

# Supplemental Figure 1

AAT-1 --MTAEK**EPL**KSREGDEAP**QNET**EGKGK**GLEKSLTLFNGVSMIVGCIIGSGIFVSPTGVQ**  
AAT-2 -----MNEK**EEFVSLNQIKL**KPRIS**LFNGCTIIIGV**IIGSGIFVSP**KGVL**  
AAT-3 MGKQEQS**EPL**NQEPSN--**EHHDE**EVGDK**GLEKMTTLFNGVSIIVGCIIGSGIFI**SPTGI**Q**

AAT-1 **EQAGSVGLSLIVWLISGIF**TAIGAYCYAELGTLIK**KSSGGDYAYIMEAFGPFVAF**IRLWIE  
AAT-2 **LEAGSAGMSL**LIWLLSGV**FAMIGAVCYSELGTLIP**KSSGGDYAYI**YEAFGPLPSFI**FLWVA  
AAT-3 **AQAGSVGLSLIVVWLSGLFAG**IGAF**CYAELGTLIR**KSSGGDYAYIMEAF**GPF**LAFLRLWIE

AAT-1 **AIVVRPCTV**TIVAL**TFAIYGLRPF**FPDC**APPDVVAEL**LAILLIVL**MTAINCISVRL**ATIV  
AAT-2 **LVIINPTSLAIIA**ITCATYAL**QPFY-SCP**VPDVVN**LFAGCI**IAVLT**FINCWDV**RMATRT  
AAT-3 **SIVVRPCTA**TIVAL**TFAIYMLKPF**YPDC**DSPL**STELIA**ALLLVLLTAV**NCISV**KWASKV**

AAT-1 **QDWFTIAKVV**AL**CLII**L**TGL**GL**FFGESQYK**DSFENIF**ENTSQD**FTKV**SLAFYSGLFAYS**  
AAT-2 **NDFFTITK**LIAL**TLII**TCGGY**WLSLGH**IDNL-V**MPDVA**EG**SQTKLSAI**AMAFY**SGVFSFS**  
AAT-3 **QDFEFVTK**TAAL**VLI**IFT**TGL**WN**MVSGKPEAF**DSFENI**FENTAKD**LETA**SLAFYSGLFAYQ**

AAT-1 **GWNFLNFIVEELQNP**KRNL**PLAIAIS**ITS**CTVIYV**LT**NVALYTAIS**PDEML**ESPAVA**VLF  
AAT-2 **GFSYLN**FVTEEL**KNPFR**N**LPRAIYIS**IP**IVTIVYMI**VN**IAYFSV**LT**VDEILD**SDAV**AITF**  
AAT-3 **GWNFLNFIVEELQNP**KRNL**PLSIAIS**CS**LCTIIY**T**LTNVALY**TS**ITP**DEML**ASPAVA**VLF

AAT-1 **ANKLYGKFA**--**FIMPL**CVAC**STIGSANGVI**FT**SARLFYSGAREGQMP**AV**LTMIN**KK**TKTP**  
AAT-2 **ADKILGTF**G**SKIL**MPL**LVSF**SCV**GLNGILIT**CS**RMFFSGARNSQL**PE**LFAMIS**IR**QLTP**  
AAT-3 **AEKNYGWFA**--**FCMP**IFVAC**STIGSANGVILT**SS**RRLFYCGAREGQMPN**V**LTMVN**KT**TKTP**

AAT-1 **IPAVILT**GALS**SIAYLL**ASK**DVYQLIN**YIQ**ISYWLAIG**TA**IAALFWLRR**T**MPDA**---SR**PI**  
AAT-2 **IPSLIF**LG**GSIV**ML**F-IGNV**F**QLIN**YLS**FAESLVV**FSS**VAGLLK**LR**FTMPEN**V**LNARPI**  
AAT-3 **IPAVILT**GL**LSLLY**LL**LSNNI**Y**SLIN**YIQ**VSYWIAIG**GA**ILALFYFR**K**TMPDA**---P**RAV**

AAT-1 **KVPLI**WPA**IFLAG**CIAL**VLI**PMV-**AAPRD**TGI**GLLIM**LS**AVPVYGI**FI**GWKNKPKW**FNEF  
AAT-2 **KISLL**WP**ILFFLM**CL**FL**LIL**PPFHS**DP**WELIYGV**FLV**LSGIF**PIY**VLFVYN**KY**RFGFI**Q**SV**  
AAT-3 **KAPIV**FPI**IFFIG**CV**LLVLP**V**L-GNPK**DTAI**GILIM**LS**GV**PVY**LIFIA**W**KGKPKCID**SL

AAT-1 **ID**SS**TVFIQ**KL**FMV**V**DE**D**KED**  
AAT-2 **WIG**FT**HFIQ**KL**FYCV**PE**LSS**  
AAT-3 **TDS**VI**IFTQ**KL**FMV**V**DAN**KE
